# Supplementary material for: Nanomaterial-based adsorbents and optical sensors for illicit drug analysis
Source: PubMed Central journal article supplement — J Food Drug Anal. 2020 Dec 1;28(4):654–76. doi: 10.38212/2224-6614.1137 (PMC9261814; doi:10.38212/2224-6614.1137), 2020-12-01
Supplement: jfda-28-04-654-s001.pdf [file jfda-28-04-654-s001.pdf]

## **Research Highlight**

- Magnetic nanomaterials significantly improve the extraction efficiency compared to conventional sample preparation
- Gold nanoparticles with size-dependent surface plasmon resonance were widely applied in colorimetric sensors for detecting illicit drugs
- Nanomaterials with fluorescent characteristics become the new alternatives as a part of fluorescent sensors to analyze illicit drugs.
